# Supplementary material for: Microbial secondary metabolites in school buildings inspected for moisture damage in Finland, The Netherlands and Spain
Source: Royal Society of Chemistry journal article supplement (doi:10.1039/c2em30195d), 2012-01-01
Supplement: c2em30195d.pdf [file c2em30195d.pdf]

## Electronic Supplementary Information

### Results

#### Analyses of mouldy spot surface swab samples

Table S1 summarizes the results of the analyses of the mouldy spot surface swab (MSS) samples for the three countries. In Spanish index school buildings, trichodermol, verrucarol, stachybotrylactam and roquefortine C were found exclusively in MSS, but not in SDS samples (Table 2). Trichodermol and stachybotrylactam were detected in one and the same MSS sample. Emodin was found in both, MSS and SDS samples of the same location; meleagrín and griseofulvin were also found in both sample types, but not in samples of the same location. Generally, mycotoxin concentrations in mouldy spot surface swabs were found to be higher compared to settled dust samples, typically at least by one order of magnitude.

A big variety of 21 different metabolites was detected from 35 MSS samples from Dutch school buildings. Of these, only beauvericin, emodin, enniatin B, and meleagrín were detected in both, MSS extracts SDS samples from the same locations as well as in additional samples from other locations of the same buildings. Enniatins A, A1 and B1, and physcion were prevalent in MSS and SDS samples collected from the same school buildings; however, those toxins were not detected in both sample types of the same locations. Mostly, the concentrations measured in surface swabs were much higher compared to settled dust samples (see Tables 3 and S1).

In Finland, chaetoglobosin A, meleagrín, 3-nitropropionic acid, physcion, sterigmatocystin and tentoxin were detected in MSS samples (Table S1), but not in SDS samples from the same locations or buildings. Emodin and enniatin B and B1 were found in SDS and MSS samples from same sampling locations as well as in samples from different locations but the same school buildings.

Table S2 supplements table 5 of the main manuscript and shows the differences in rank sums for number of metabolites per sample for sample *s* derived from locations/rooms with and without observations of moisture damage and dampness. In line with the approach described for Table 5, the comparisons are shown for different cut-off values for the enumeration of metabolites in a given sample.

## Supplementary Tables

**Table S1.** Fungal and bacterial secondary metabolites detected in surface swab samples (MSS) collected from visibly water damaged areas and mouldy spots in Spanish, Dutch and Finnish school buildings.

|                  | Spain<br>N <sub>samples</sub> = 12<br>Conc. [pg cm <sup>-2</sup> ] |      |     |                            | Netherlands<br>N <sub>samples</sub> = 35<br>Conc. [pg cm <sup>-2</sup> ] |      |      |                            | Finland<br>N <sub>samples</sub> = 19<br>Conc. [pg cm <sup>-2</sup> ] |       |        |                            |
|------------------|--------------------------------------------------------------------|------|-----|----------------------------|--------------------------------------------------------------------------|------|------|----------------------------|----------------------------------------------------------------------|-------|--------|----------------------------|
|                  | Positive samples (%) <sup>†</sup>                                  | Mean | Max | Building category detected | Positive samples (%) <sup>†</sup>                                        | Mean | Max  | Building category detected | Positive samples (%) <sup>†</sup>                                    | Mean  | Max    | Building category detected |
| Altertoxin       |                                                                    |      |     |                            | 1 (2.9)                                                                  | 0.59 | 20.5 | index                      |                                                                      |       |        |                            |
| Beauvericin      |                                                                    |      |     |                            | 3 (8.6)                                                                  | 14.8 | 499  | index,<br>not categorized  |                                                                      |       |        |                            |
| Chanoclavin      |                                                                    |      |     |                            | 2 (5.7)                                                                  | 0.29 | 7.20 | index,<br>not categorized  |                                                                      |       |        |                            |
| Chaetoglobosin A |                                                                    |      |     |                            |                                                                          |      |      |                            | 1 (5.3)                                                              | 11549 | 219429 | index                      |
| Emodin           | 1 (8.3)                                                            | 40.0 | 480 | index                      | 5 (14.3)                                                                 | 2.14 | 30.5 | index,<br>not categorized  | 4 (21.1)                                                             | 1.68  | 27.9   | index,<br>not categorized  |
| Enniatin A       |                                                                    |      |     |                            | 2 (5.7)                                                                  | 6.19 | 214  | index,<br>not categorized  |                                                                      |       |        |                            |
| Enniatin A1      |                                                                    |      |     |                            | 1 (2.9)                                                                  | 18.5 | 648  | not categorized            |                                                                      |       |        |                            |
| Enniatin B       |                                                                    |      |     |                            | 8 (22.9)                                                                 | 188  | 5100 | index,<br>not categorized  | 9 (47.4)                                                             | 36.2  | 498    | index                      |
| Enniatin B1      |                                                                    |      |     |                            | 2 (5.7)                                                                  | 41.7 | 1458 | index,<br>not categorized  | 6 (31.6)                                                             | 72.4  | 995    | index                      |
| Enniatin B2      |                                                                    |      |     |                            | 1 (2.9)                                                                  | 1.63 | 57.0 | not categorized            |                                                                      |       |        |                            |
| Equisetin        |                                                                    |      |     |                            | 2 (5.7)                                                                  | 0.16 | 5.36 | index                      |                                                                      |       |        |                            |
| Fumigaclavin     |                                                                    |      |     |                            | 2 (5.7)                                                                  | 3.08 | 81.0 | index,<br>not categorized  |                                                                      |       |        |                            |

|                          |          |      |      |       |          |           |             |                                                            |          |      |      |       |
|--------------------------|----------|------|------|-------|----------|-----------|-------------|------------------------------------------------------------|----------|------|------|-------|
| Griseofulvin             | 1 (8.3)  | 4.17 | 50.0 | index |          |           |             |                                                            |          |      |      |       |
| Meleagrín                | 2 (16.7) | 68.7 | 816  | index | 9 (25.7) | 2548<br>9 | 7440<br>00  | index,<br>reference, not<br>categorized<br>not categorized | 1 (5.3)  | 7.49 | 142  | index |
| Monactin                 |          |      |      |       | 1 (2.9)  | 0.15      | 5.40        |                                                            |          |      |      |       |
| 3-Nitropropionic<br>acid |          |      |      |       |          |           |             |                                                            | 1 (5.3)  | 1.39 | 26.4 | index |
| Nonactin                 |          |      |      |       | 1 (2.9)  | 0.07      | 2.55        | not categorized                                            |          |      |      |       |
| Physcion                 |          |      |      |       | 5 (14.3) | 234       | 7290        | index,<br>reference, not<br>categorized                    | 1 (5.3)  | 13.3 | 253  | index |
| Roquefortin C            | 1 (8.3)  | 0.24 | 2.93 | index | 3 (8.6)  | 340       | 7884        | index,<br>not categorized                                  |          |      |      |       |
| Stachybotrylactam        | 1 (8.3)  | 513  | 6150 | index | 4 (11.4) | 6023<br>3 | 1935<br>000 | index,<br>reference                                        |          |      |      |       |
| Sterigmatocystin         |          |      |      |       | 4 (11.4) | 306       | 1034<br>7   | index,<br>reference, not<br>categorized                    | 2 (10.5) | 6.78 | 122  | index |
| Tentoxin                 |          |      |      |       |          |           |             |                                                            | 1 (5.3)  | 0.95 | 18.0 | index |
| Valinomycin              |          |      |      |       | 3 (8.6)  | 1.79      | 60.0        | not categorized                                            |          |      |      |       |
| Trichodermin             | 1 (8.3)  | 0.53 | 6.30 | index | 4 (11.4) | 33.2      | 960         | index,<br>reference, not<br>categorized                    |          |      |      |       |
| Verrucarol               | 1 (8.3)  | 0.04 | 0.53 | index | 6 (17.1) | 6.50      | 82.5        | index,<br>reference, not<br>categorized                    |          |      |      |       |

† Relative abundances of positive samples (MSS) calculated according to the number of all surface swab samples collected in Spanish, Dutch, and Finnish school buildings, respectively.

**Table S2.** Differences in rank sums (Wilcoxon-Mann Whitney test) for number of metabolites per sample based on sampling location status (observations of moisture damage / dampness versus no such observations) at increasing cut-off values for the enumeration of metabolites in a sample (all metabolites; metabolites in concentration  $>0.1$ ,  $>1.0$ , and  $>10$   $\text{pg cm}^{-2}$ ).

|                                   |                    | Damage observations vs. no damage observations in sampling location |              |                                           |              |                                           |              |                                          |              |
|-----------------------------------|--------------------|---------------------------------------------------------------------|--------------|-------------------------------------------|--------------|-------------------------------------------|--------------|------------------------------------------|--------------|
|                                   |                    | all metabolites                                                     |              | metabolites<br>$>0.1$ $\text{pg cm}^{-2}$ |              | metabolites<br>$>1.0$ $\text{pg cm}^{-2}$ |              | metabolites<br>$>10$ $\text{pg cm}^{-2}$ |              |
|                                   |                    | Rank<br>sums                                                        | p-<br>value* | Rank<br>sums                              | p-<br>value* | Rank<br>sums                              | p-<br>value* | Rank<br>sums                             | p-<br>value* |
| <b>all countries<br/>combined</b> | reference<br>index | 337<br>340                                                          | 0.869        | 334<br>345                                | 0.477        | 330<br>355                                | 0.068        | 328<br>361                               | <b>0.004</b> |
| <b>Spain</b>                      | reference<br>index | 103<br>109                                                          | 0.413        | 102<br>110                                | 0.283        | 100<br>112                                | 0.086        | 100<br>112                               | 0.058        |
| <b>The<br/>Netherlands</b>        | reference<br>index | 118<br>131                                                          | 0.307        | 117<br>134                                | 0.203        | 118<br>130                                | 0.286        | 117<br>132                               | 0.166        |
| <b>Finland</b>                    | reference<br>index | 112<br>117                                                          | 0.619        | 113<br>114                                | 0.919        | 113<br>115                                | 0.773        | 113<br>112                               | 0.823        |
